# Supplementary material for: Differential expression of GS5 regulates grain size in rice
Source: PubMed Central journal article supplement (PMC4986870; doi:10.1093/jxb/erv058), 2015-02-24
Supplement: supp_erv058_jexbot137109_file001.pdf [file supp_erv058_jexbot137109_file001.pdf]

## Differential expression of *GS5* regulates grain size in rice

Chunjue Xu, Yu Liu, Yibo Li, Xiaodong Xu, Caiguo Xu, Xianghua Li, Jinghua Xiao and Qifa Zhang<sup>1</sup>

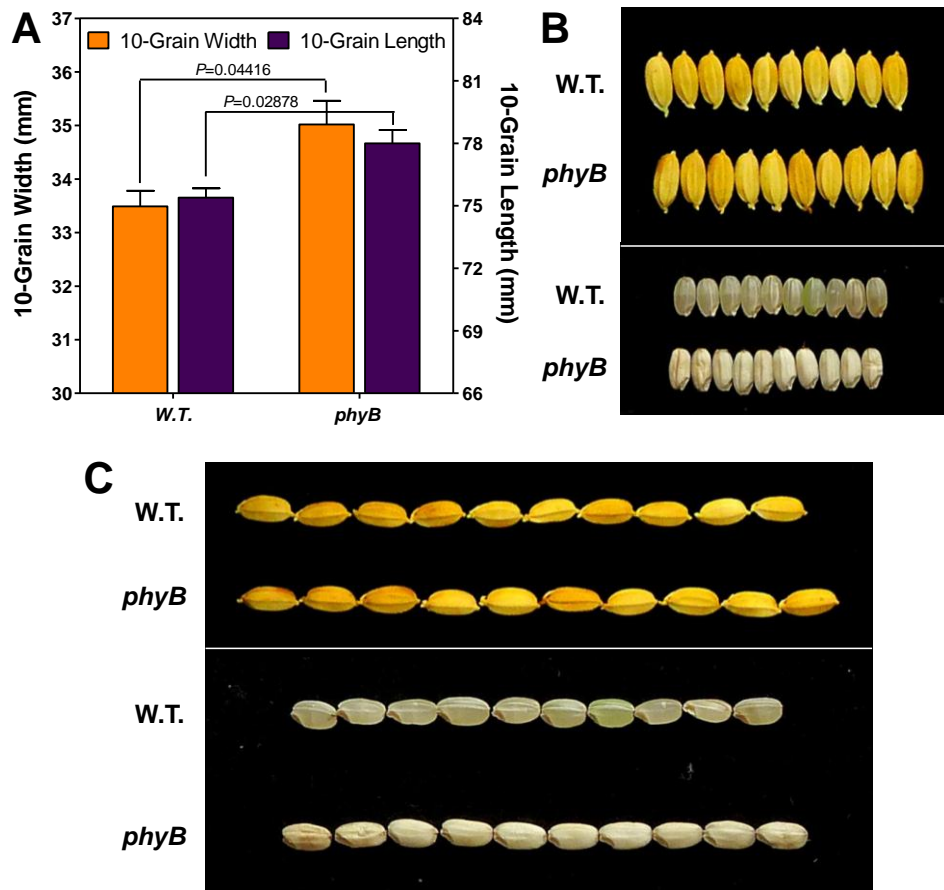

**Figure S1. Grain size and chalkiness of *phyB* mutant.** (A) Significant difference in grain size between *phyB* mutant and wild type (W.T.). All data are presented as mean  $\pm$  SE ( $n \geq 3$ ). *P* values were calculated using Student's *t*-test. (B) Grain width and chalkiness of *phyB* mutant and wild type. (C) Grain length and chalkiness of *phyB* mutant and wild type.

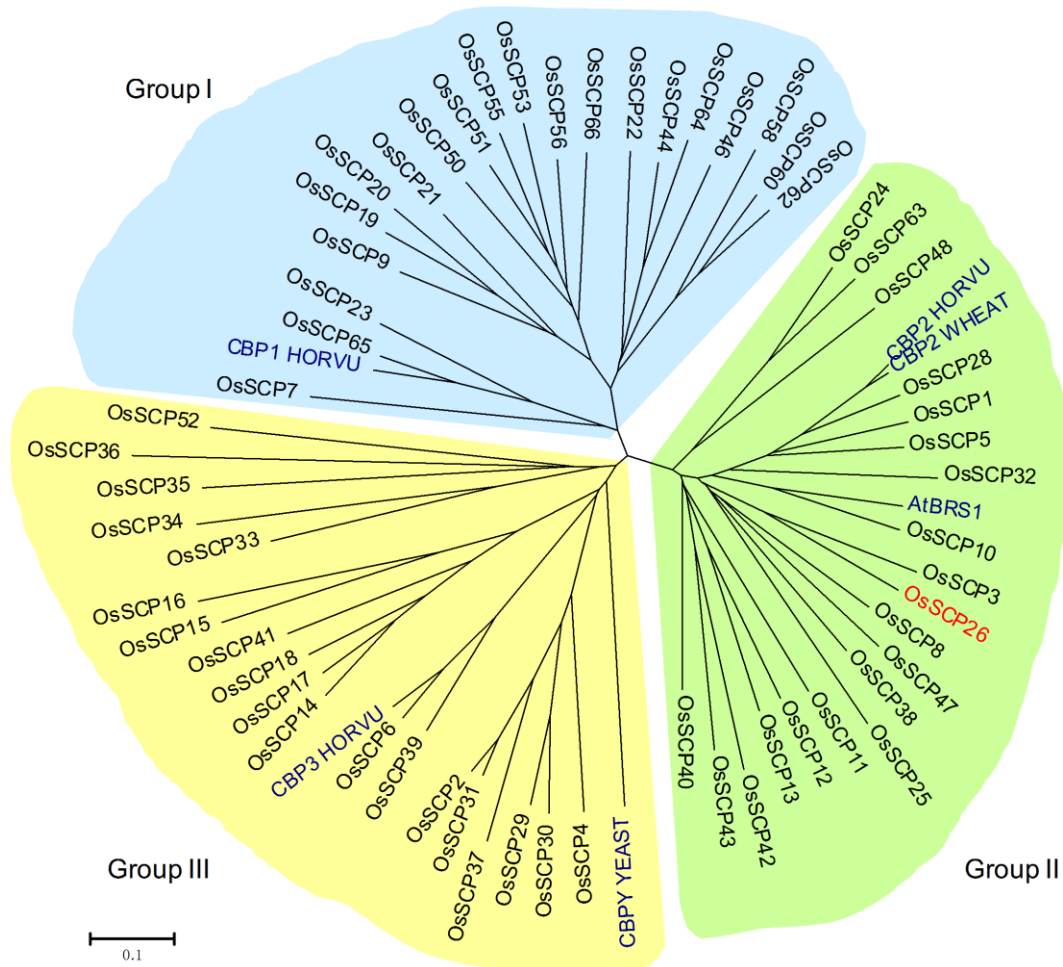

**Figure S2. Phylogenetic tree of members of the serine carboxypeptidase-like protein family.** Full-length protein sequences of OsSCPLs were downloaded from [http://rice.plantbiology.msu.edu/ca/gene\\_fams/27\\_76.shtml](http://rice.plantbiology.msu.edu/ca/gene_fams/27_76.shtml) and aligned with ClustalX and calculated with MEGA 3.1. *CBP1 HORVU* (NCBI accession NO. P07519), *CBP2 HORVU* (NCBI accession NO. P08818), *CBP3 HORVU* (NCBI accession NO. P21529) and *CBP2 WHEAT* (NCBI accession NO. P08819) were used to indicate the three groups of SCPL. *GS5 (OsSCP26)* and *AtBRS1* (NCBI accession NO. NP\_194790) belonging to SCPL group II; *CBPY YEAST* (NCBI accession NO. P00729) belongs to SCPL group III.

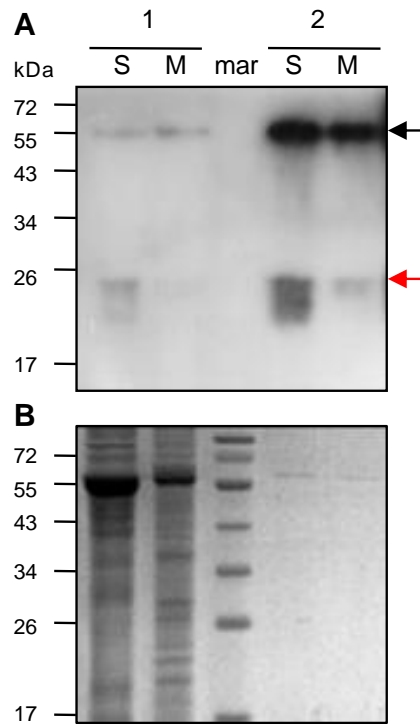

**Figure S3. Assay of GS5-FLAG protein in  $P_{Ubi}::GS5-FLAG$  transgenic positive plants.**

(A) Western blot assay of GS5-FLAG transgenic plants using anti-FLAG antibody showing the cleavage of GS5-FLAG in  $P_{Ubi}::GS5-FLAG$  transgenic positive plants into two chains (A and B). 1, Total protein extracted from transgenic positive plants; 2, Eluted proteins after anti-FLAG M2 agarose affinity purification; mar, Marker; S, Soluble protein sample; M, solubilized membrane protein sample; black arrow, full-length GS5-FLAG protein; red arrow, the C-terminal of GS5, B chain-FLAG peptide. (B) Coomassie Blue-stained protein samples of (A).

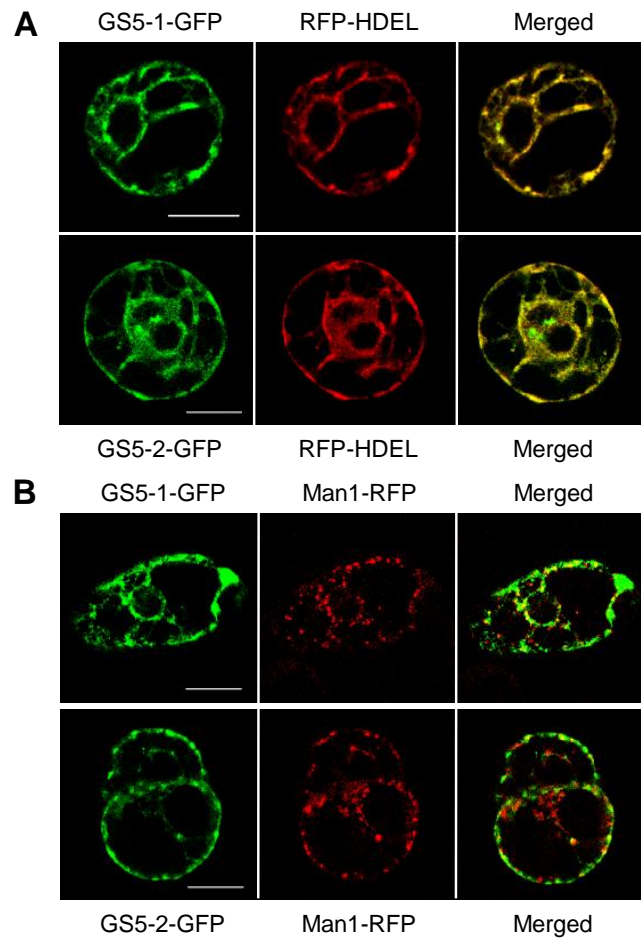

**Figure S4. Co-localization assay of GS5 with endoplasmic reticulum marker inside the cell.** (A) Co-expression of GS5-GFP and endoplasmic reticulum marker RFP-HDEL in tobacco BY-2 protoplasts showing co-localization of the two proteins. (B) Co-expression of GS5-GFP and *cis*-Golgi marker Man1-RFP in tobacco BY-2 protoplasts showing distinct localization of the two proteins. The experiments were repeated three times, yielding similar results, and representative images are shown. Scales bars = 20  $\mu$ m.

CBP2\_HORVU 1 ---MRTTTRRLPPAPAAAAVLLAATTC-LLLRPAAVAAAGCH-----AADRTVRLP  
 CBP2\_WHEAT 1 -----VEPSCH-----AADRTARLP  
 OsSCP28 1 MELPRMASRRLPLPLVAQLVVLGLACGLRSSSSAAAAASCL-----AGERVTYLP  
 AtBRS1 1 ----MAR----THFIFLLIVAL-----LSTTFPSSSSSREQ-----EKDRLKALP  
 OsSCP10 1 ----MATRGRIVAAVASVVVAV-----LAVAVGVNCGGCEA-----ERDRVEALP  
 OsSCP8 1 ----MACATAAAVSSSFLALALLSLCAAAGGSPQLDAEAR-----QQEADRVTRLP  
 OsSCP38 1 ----MACRQQLVVVGMVVVMMQWTGGAAARHHHHHHHHKSYEEVFDRQEADRVQRLP  
 OsSCP47 1 ----MKVQTSSPCLLLLLGSLALVTLTLCGPAASARPETGSLDAS-ATAAMELQELDRVMSLP  
 OsSCP3 1 ----MASCASPRLKSLCHHPLETLTLLALSLLOTITAE-----EQEADRVARLP  
 OsSCP26 1 ----MAVAAAAARRRDVSCLLLLLCFSSSMAATGGGGG-----EQEADRVARLP

△△

I

CBP2\_HORVU 48 GQPEVD--FDMSGYITVDEAAGRSLFYLLQEQAP--EEAQPAPLVLWLNKGGPGCSSVAYG  
 CBP2\_WHEAT 16 GQPAVD--FDMSGYITVDEGAGRSLFYLLQEQAP--EDAQPAPLVLWLNKGGPGCSSVAYG  
 OsSCP28 52 GQPPVD--FDMSGYVTVDKRAGRSLFYWLQEQAP--AAQAPAPLVLWLNKGGPGCSSVAYG  
 AtBRS1 38 GQPKVA--FSQYSGYVNVNQHSHGRALFYWLTESSSPSP-HTKPLLLWLNKGGPGCSSTAYG  
 OsSCP10 42 GQPPVA--FAQYAGYVAVSEASGRALFYWLTEAAAAAAATKPLVLWLNKGGPGCSSTAYG  
 OsSCP8 50 GQPAVR--FAQYAGYVTVNETHGRALFYWFFEAT--AADKKPLVLWLNKGGPGCSSVGYG  
 OsSCP38 57 GQPAELG-FRQYAGYVTVNETHGRALFYWFFEAA--SDVATKPLVLWLNKGGPGCSSTGYG  
 OsSCP47 59 GQPAYSPEFRQYSGYVTTDEYLGKALFYWFLEAT--DKPDKPLVLWLNKGGPGCSSTGYG  
 OsSCP3 46 GQPRSPQ-MSQYSGYITVNSQNGRALFYWFFEALPS--KKPLLLWLNKGGPGCSSVGYG  
 OsSCP26 49 GQPASPA-VSQYAGYVGVDERHGRALFYWFFEALQASPAPEKKPLLLWLNKGGPGCSSTGYG

CBP2\_HORVU 104 ASEELGAFRVMPRGAGLVLNEYRWNKVANVFLDSPAGVGFSTNTSSDIYTSGDNRTAH  
 CBP2\_WHEAT 72 ASEELGAFRVKPRGAGLVLNEYRWNKVANVFLDSPAGVGFSTNTSSDIYTSGDNRTAH  
 OsSCP28 108 ASEELGAFRTRPDGATLFLNDYRWNKVANILFLDSPAGVGFSTNTTSDLYDSGDKRTAH  
 AtBRS1 95 ASEEIGPFRNKGTGLYLNKYSWNREANLLFLESPAGVGFSTNTSSDLKDSGDERTAQ  
 OsSCP10 100 ASEEIGPFRNKGTGLYLNKYSWNREANLLFLESPAGVGFSTNTTSDLKTSGDERTAQ  
 OsSCP8 106 EAHELGPFLVQKGPPELKNWYKNEANLLFLESPVGVGFSTNTSSDLQQLGDKITAD  
 OsSCP38 114 ALEELGPLLVNND-TLITNPESWNKEANLLFVESPAGVGFSTNTTDLAHFGDNLTAH  
 OsSCP47 117 QAQELGPLVKKDVAELELNPNYAWNQVANLLFLDSPAGVGFSTNTSFGKDPGDNSTAY  
 OsSCP3 103 AASELGPLMNGNCTGLEFNKEAWNNEANLLFLESPVGVGFSTNTSSDLESIDDFVAE  
 OsSCP26 108 AASELGPLRVAROGAALEFNQYGNWKEANLLFLESPVGVGFSTNTSSDLSNLNDDFVAE

△△

CBP2\_HORVU 164 DSYAFLAAWFERFPHYKYREFYIAGESYAGHYVPELSQLVHRS-----GNPVINLK  
 CBP2\_WHEAT 132 DSYAFLAKWFERFPHYKYRDFYIAGESYAGHYVPELSQLVHRS-----KNPVINLK  
 OsSCP28 168 DSYKFLVWFKRFPOYKYRDFYIAGESYAGHYVPQLSOLVYRNKKGV----KEPLINLK  
 AtBRS1 155 DNLIFLIKWLSRFPOYKYRDFYIAGESYAGHYVPQLAKKINDYNKAF----SKPTINLK  
 OsSCP10 160 DALQFLISWMSRFPOYRHRDFYIAGESYAGHYVPQLARKIVFENKAS----PYPFINLK  
 OsSCP8 166 DAYIFLLNWEKRFPOYKSHDFYIAGESYAGHYVPQLSEKIFDGNKQGPKEN----YINLK  
 OsSCP38 173 DAHAFLVNWLERFPOYKGHDLIAGESYAGHYVPQLATKILHENKKKKEHDDDDRTINLK  
 OsSCP47 177 GSYTFLIRWFRFPOYKHKMEFYIAGESYAGHYVPQLANVIVDQNKIAP----KENYINLK  
 OsSCP3 163 DTYNFLVNWFKRFPOYKNDHDFYISGESYAGHYVPQLADVYERNKHVE----TNQHINLK  
 OsSCP26 168 DAYSFLVNWFKRFPOYKDNEFYISGESYAGHYVPQLADLVYERNKDKR----ASTYINLK

\*\*\*\*\*

CBP2\_HORVU 215 GFMVGNGLIDDYHDYVGTFFFWNHGIVSDDTYRRLKDACLHDSFIHSPACDAATDVAT  
 CBP2\_WHEAT 183 GFMVGNGLIDDYHDYVGTFFFWNHGIVSDDTYRRLKEACLHDSFIHSPACDAATDVAT  
 OsSCP28 223 GFMVGNVTDYHDYIGTFFYWNHGIISDGTYRLINASCVHDSGEHPAPACLAALNAST  
 AtBRS1 210 GFLVGNVTDNYDNI GTVTYWWTHAMISDTSYKYSILKYCNFTVERVSDDCDNAVNYAMN  
 OsSCP10 215 GILVGNVTDNYDNI GTVTYWWTHAMISDTSYKAIMSSCNFTSANVSRLCNRAMS YAMN  
 OsSCP8 222 GFMIGNALMDETDQTMIDYAWDHAVISDRVYADVKKYCNFS-MENVTDACDSALTEYF  
 OsSCP38 233 GIMIGNAIDSSDDRGLVEYAWDHAVISDEIYAATKGNCTEPDDGNETDKCNTAWNGFF  
 OsSCP47 233 GIMIGNAYMDGTDLLGIVDSAWHHALISDKLYSDFQKFCNFSLVDLN-KECNAATDQFN  
 OsSCP3 219 GFTVGNVTDYDYDYKGLVEFAWSSHVISDQLYKHVNNVCDERLSPRS-NECNHVMGYIY  
 OsSCP26 224 GFTVGNPLTDDYDYSKGLAEYAWSHAVISDQVYERI KKT CNFKNSNWT-DDCNAAMNII F





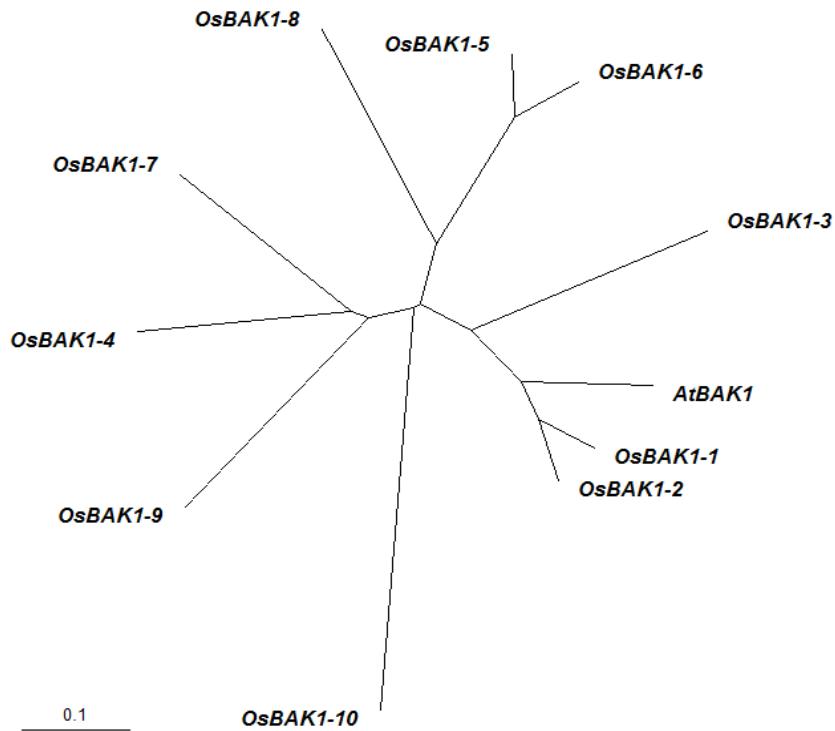

**Figure S6. Phylogenetic tree of the rice BAK1 homologues.** Full-length protein sequences of the rice BAK1 homologues were obtained by BLAST using the AtBAK1 (NCBI accession NO. NM\_119497) sequence from <http://rice.plantbiology.msu.edu/index.shtml>, aligned with ClustalX and calculated with MEGA 3.1. OsBAK1-1, LOC\_Os08g07760; OsBAK1-2, LOC\_Os04g38480; OsBAK1-3, LOC\_Os06g12120; OsBAK1-4, LOC\_Os01g07630; OsBAK1-5, LOC\_Os02g18320; OsBAK1-6, LOC\_Os03g49620; OsBAK1-7, LOC\_Os06g16330; OsBAK1-8, LOC\_Os11g39370; OsBAK1-9, LOC\_Os02g14120; and OsBAK1-10, LOC\_Os03g16010.

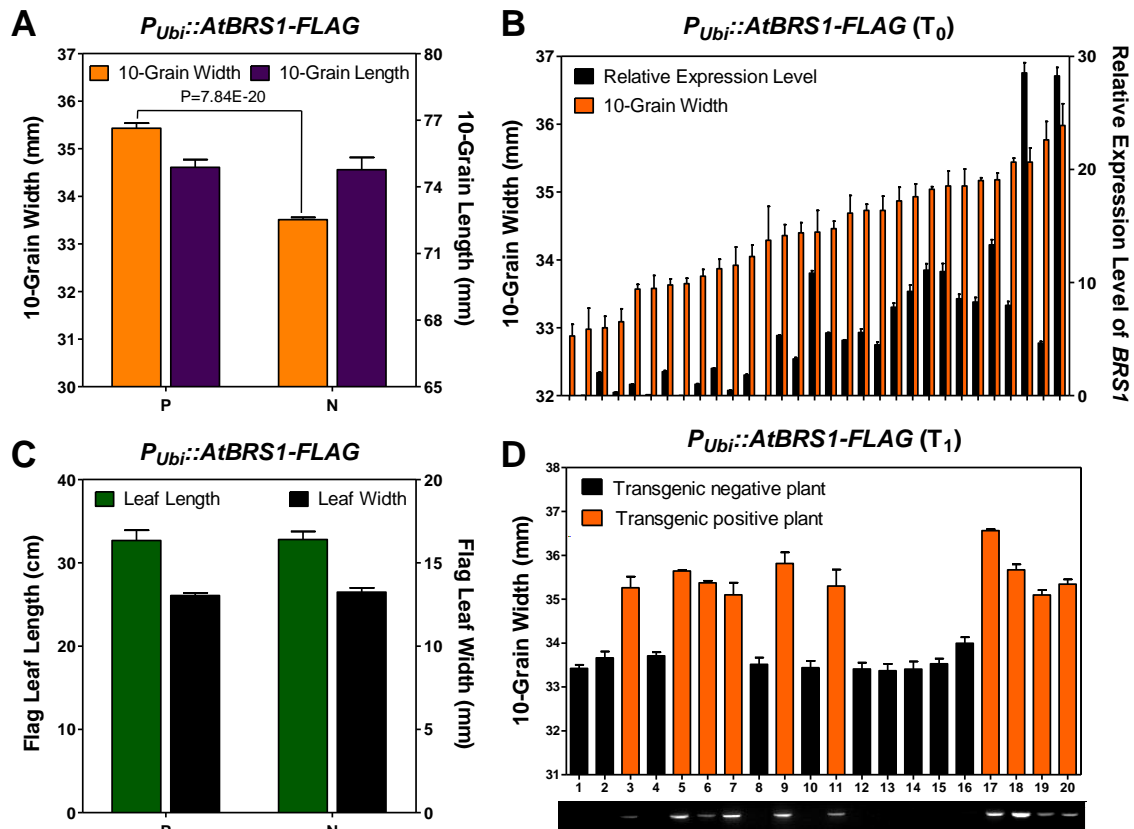

**Figure S7. Grain size and leaf size of *P<sub>Ubi</sub>:: AtBRS1-FLAG* transgenic plants.** (A) Grain width and grain length of T1 transgenic rice plants overexpressing *AtBRS1*. P, transgenic positive plants; N, transgenic negative plants. (B) Co-segregation of grain width with expression level of *AtBRS1* in T0 transgenic rice plants. (C) Flag leaf width and length of T1 transgenic rice plants overexpressing *AtBRS1*. P, transgenic positive plants; N, transgenic negative plants. (D) Co-segregation of grain width with *AtBRS1* genotype in T1 transgenic rice plants. All data are presented as mean  $\pm$  SE ( $n \geq 3$ ). *P* values were calculated using Student's *t*-test.



**Table S1. Polymorphisms and cis -acting elements in the 2-kb promoter of GS5 .**

| Position | SNPs/InDels |       | Sequence   | Cis -acting elements | Organism                       | Function                               |
|----------|-------------|-------|------------|----------------------|--------------------------------|----------------------------------------|
|          | GS5-1       | GS5-2 |            |                      |                                |                                        |
| -1961    | /           | /     | CAANNNNATC | circadian            | <i>Lycopersicon esculentum</i> | Circadian control                      |
| -1723    | /           | /     | ATTAAT     | Box4                 | <i>Petroselinum crispum</i>    | Light responsiveness                   |
| -1656    | /           | /     | AATCTAATCT | ATCT-motif           | <i>Arabidopsis thaliana</i>    | Light responsiveness                   |
| -1630    | /           | /     | CAACTG     | MBS                  | <i>Arabidopsis thaliana</i>    | MYB binding site, drought-inducibility |
|          |             |       |            | E-box                | <i>Arabidopsis thaliana</i>    | Brassinosteroid responsiveness         |
| -1620    | /           | /     | GGAGATG    | GAG-motif            | <i>Hordeum vulgare</i>         | part of a light responsive element     |
| -1595    | C           | T     | /          | /                    | /                              | /                                      |
| -1539    | /           | /     | CATATG     | E-box                | <i>Arabidopsis thaliana</i>    | Brassinosteroid responsiveness         |
|          |             |       |            | ABRE                 | <i>Arabidopsis thaliana</i>    | Abscisic acid responsiveness           |
| -1518    | /           | /     | CACGTG     | G-box                | <i>Arabidopsis thaliana</i>    | Light responsiveness                   |
|          |             |       |            | E-box                | <i>Arabidopsis thaliana</i>    | Brassinosteroid responsiveness         |
| -1514    | /           | /     | TGACG      | TGACG-motif          | <i>Hordeum vulgare</i>         | MeJA-responsiveness                    |
| -1489    | /           | /     | CCGTCC     | A-box                | <i>Petroselinum crispum</i>    | cis -acting regulatory element         |
|          |             |       |            | CCGTCC-box           | <i>Arabidopsis thaliana</i>    | Meristem specific activation           |
| -1476    | -           | A     | /          | /                    | /                              | /                                      |
| -1466    | T           | A     | /          | /                    | /                              | /                                      |
| -1464    | T           | G     | /          | /                    | /                              | /                                      |
| -1463    | A           | G     | /          | /                    | /                              | /                                      |
| -1391    | G           | A     | /          | /                    | /                              | /                                      |
| -1376    | /           | /     | ATTAAT     | Box4                 | <i>Petroselinum crispum</i>    | Light responsiveness                   |
| -1345    | /           | /     | ATTTTCTTCA | TC-rich repeats      | <i>Nicotiana tabacum</i>       | Defense and stress responsiveness      |
| -1314    | /           | /     | CGGTCA     | MBS                  | <i>Zea mays</i>                | MYB Binding Site                       |
| -1303    | A           | G     | /          | /                    | /                              | /                                      |
| -1281    | T           | -     | /          | /                    | /                              | /                                      |
| -1242    | /           | /     | TGACG      | TGACG-motif          | <i>Hordeum vulgare</i>         | MeJA-responsiveness                    |
| -1223    | /           | /     | CACTTG     | E-box                | <i>Arabidopsis thaliana</i>    | Brassinosteroid responsiveness         |
| -1218    | /           | /     | GTCAT      | Skn-1-motif          | <i>Oryza sativa</i>            | Endosperm expression                   |
| -1204    | /           | /     | CCG/ACCC   | Spl                  | <i>Zea mays</i>                | Light responsive element               |
| -1164    | /           | /     | CACTTG     | E-box                | <i>Arabidopsis thaliana</i>    | Brassinosteroid responsiveness         |
| -1159    | /           | /     | GTCAT      | Skn-1-motif          | <i>Oryza sativa</i>            | Endosperm expression                   |
| -1142    | /           | /     | CATTTG     | E-box                | <i>Arabidopsis thaliana</i>    | Brassinosteroid responsiveness         |
| -1109    | C           | T     | /          | /                    | /                              | /                                      |
| -1096    | /           | /     | CAATTG     | E-box                | <i>Arabidopsis thaliana</i>    | Brassinosteroid responsiveness         |
| -1088    | /           | /     | AAACAGA    | GARE-motif           | <i>Brassica oleracea</i>       | Gibberellin-responsive element         |
| -1076    | A           | G     | /          | /                    | /                              | /                                      |
| -1032    | A           | T     | /          | /                    | /                              | /                                      |
| -1015    | G           | T     | /          | /                    | /                              | /                                      |

Continuing Table S1

|       |   |   |           |                       |                                |                                        |
|-------|---|---|-----------|-----------------------|--------------------------------|----------------------------------------|
| -1013 | / | / | CAGATG    | E-box                 | <i>Arabidopsis thaliana</i>    | Brassinosteroid responsiveness         |
|       |   | G | GATAGGA   | GATA-motif            | <i>Arabidopsis thaliana</i>    | part of a light responsive element     |
| -895  | A |   | GATAAGATT | I-box                 | <i>Arabidopsis thaliana</i>    | part of a light responsive element     |
| -879  | / | / | TTTCAA    | BoxI                  | <i>Pisum sativum</i>           | Light responsive element               |
| -847  | T | - | /         | /                     | /                              | /                                      |
|       |   | T | TCTTAC    | TCT-motif             | <i>Arabidopsis thaliana</i>    | part of a light responsive element     |
| -825  | C |   | /         | /                     | /                              | /                                      |
|       |   | C | CCG/ACCC  | Spl                   | <i>Zea mays</i>                | Light responsive element               |
| -788  | A |   | /         | /                     | /                              | /                                      |
| -756  | / | / | ATTAAT    | Box4                  | <i>Petroselinum crispum</i>    | Light responsiveness                   |
| -710  | / | / | GTCAT     | Skn-1-motif           | <i>Oryza sativa</i>            | Endosperm expression                   |
|       |   | G | TGACG     | TGACG-motif           | <i>Hordeum vulgare</i>         | MeJA-responsiveness                    |
| -671  | A |   | /         | /                     | /                              | /                                      |
| -409  | / | / | AAACAGA   | GARE-motif            | <i>Brassica oleracea</i>       | Gibberellin-responsive element         |
| -375  | / | / | TAACTG    | MBS                   | <i>Arabidopsis thaliana</i>    | MYB binding site, drought-inducibility |
| -371  | / | / | TGAGTCA   | GCN4-motif            | <i>Oryza sativa</i>            | Endosperm expression                   |
| -368  | / | / | GTCAT     | Skn-1-motif           | <i>Oryza sativa</i>            | Endosperm expression                   |
| -326  | - | C | /         | /                     | /                              | /                                      |
| -325  | - | A | /         | /                     | /                              | /                                      |
| -324  | - | A | /         | /                     | /                              | /                                      |
| -323  | - | A | /         | /                     | /                              | /                                      |
| -225  | / | / | ATTTCTTCA | TC-rich repeats       | <i>Nicotiana tabacum</i>       | Defense and stress responsiveness      |
| -100  | / | / | TTTCTTCT  | 5'UTR Py-rich stretch | <i>Lycopersicon esculentum</i> | Conferring high transcription levels   |

-, single nucleotide deletion; /, not detected.

**Table S2. Primers used in this work.**

| Name                       | Sequence                                 |
|----------------------------|------------------------------------------|
| <b>Expression analysis</b> |                                          |
| GS5qF                      | AGTGGACTGCTTCCAGGGAAG                    |
| GS5qR                      | CACGCAGTACCGAGAACTGA                     |
| Act1F                      | TGCTATGTACGTCGCCATCCAG                   |
| Act1R                      | AATGAGTAACCACGCTCCGTCA                   |
| <b>Promoter constructs</b> |                                          |
| PAF                        | AAGCTTTCGTATGGAATTACCTAGCTATGCA          |
| PBF                        | AAGCTTTTGACGAGAGGCAAGGACCCCA             |
| PCF                        | AAGCTTGATGGGAGAGATAGATAGACTC             |
| PDF                        | AAGCTTTGCAACCCGGATCTGGACAGA              |
| PDR                        | GGATCCTGCTAACCCGTGGTGCCGAGCTCTAGC        |
| -1109mutF                  | ACACAGGATTTTGACAGGAATAC                  |
| -1109mutR                  | GTATTCCTGTCAAAATCCTGTGT                  |
| -1032mutF                  | TGATTGGACCACTGAAAAAAC                    |
| -1032mutR                  | GTTTTTTCAGTGGTCCAATCA                    |
| -825mutF                   | CTCCAAAATCCTTACATTTTTTCT                 |
| -825mutR                   | AGAAAAATGTAAGAATTTTGGAG                  |
| B_GAmutF                   | ACAATTGTAACCAAGAGGATTTGTA                |
| B_GAmutR                   | TACAAATCCTCTTGGTTACAATTGT                |
| C_LIGHTmutF                | CTCCAAAATCCTTACATTTTTTTC                 |
| C_LIGHTmutR                | GAAAAAATGTAAGGATTTTGGAG                  |
| <b>cDNA constructs</b>     |                                          |
| GS5cDNAF                   | GGTACCTAGCTAGAGCTCGGCACCACGGGTTAGCAA     |
| GS5cDNAR                   | GGATCCTCTGCTTGTCTGGAAGCTTCTCACCATGAAG    |
| OsBAK1-7cDNAF              | GGTACCTACCTGAGCTCAGCAATGGA               |
| OsBAK1-7cDNAR              | GTAACTCTGGGGCCGGAGAGCTC                  |
| OsMSBP1cDNAF               | CTCGAGATGGCGGCGGGTGGCGGA                 |
| OsMSBP1cDNAR               | GGATCCACTTTCTTTGGCGCCTTCATCAGGTGCA       |
| GS5AchainF                 | GAATTCGGGATCCATATGGAGCAGGAGGCTGACAGGGT   |
| GS5AchainR                 | CTGCAGCTCGAGGCGGCCGCTTAGAAGGCACTTTGGGGCA |
| GS5BchainF                 | GAATTCGGGATCCATATGTTTTTCAGGCTATGATCCATGC |
| GS5BchainR                 | CTGCAGCTCGAGGCGGCCGCTTCTGCTTGTCTGGAAGCTT |
| OsBAK1-4LRRF               | ACTAGTATGGAATTCAACTACGAAGTGGTGGCGCTGA    |
| OsBAK1-4LRRR               | CTCGAGGATATCATCTCCAGACTTGACACCACAGATC    |
| OsBAK1-7LRRF               | ACTAGTATGGAATTCAACAACGAAGTGAAGCTCTGATTG  |
| OsBAK1-7LRRR               | GCGGCCGCGGATCCATCCTGCTCCCTGTTGGCGTC      |
| OsBAK1-9LRRF               | ACTAGTATGGAATTCAACTACGAAGTGGCGGCGCTGATG  |
| OsBAK1-9LRRR               | CTCGAGGGATCCGCAACCATGCATAATTGATGAATTGC   |
| OsBAK1-4KDF                | GGATCCCATATGAGGCGCAATCAGCAGATCTT         |
| OsBAK1-4KDR                | ACTAGTGAATTCCCTCGGTCCAGAGAGCTCCA         |
| OsBAK1-7KDF                | GGATCCCATATGCGCCGCAACCGGCAGATCCT         |
| OsBAK1-7KDR                | ACTAGTGAATTCTCTGGGGCCGGAGAGCTCGA         |
| OsBAK1-9KDF                | CATATGGAATTCTGCAGATGGCGCTTGCCTTT         |
| OsBAK1-9KDR                | ACTAGTCTCGAGTCTGGGACCAGATAGCTCAATTGG     |
